# Supplementary material for: Dimerization effects on the electronic properties of candidate OLED materials for optimized performance: a quantum DFT study
Source: Royal Society of Chemistry journal article supplement (doi:10.1039/d5cp00213c), 2025-01-01
Supplement: d5cp00213c10.pdf [file d5cp00213c10.pdf]

## Supporting Information

**Title: Dimerization Effects on Electronic Properties of  
OLED Candidate Materials for Optimized  
Performance: A quantum DFT study**

**Authors:** Ramtin K.Rad, Mohammad Hossein Hoorzad,  
Mahdi Zarif\*

Department of Chemistry, Shahid Beheshti University,  
Tehran

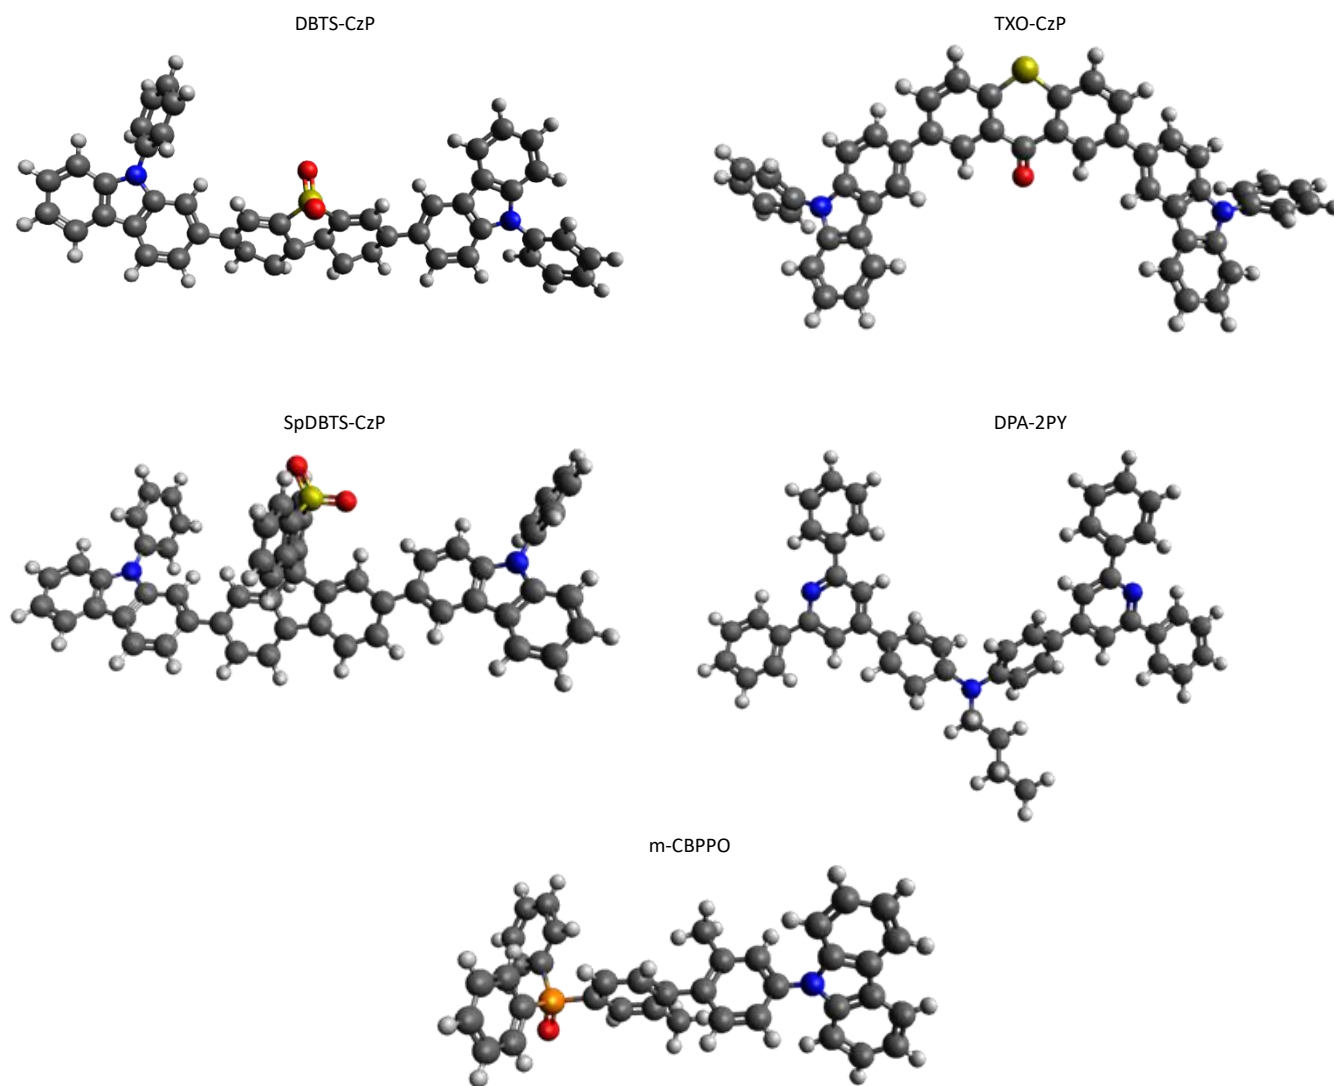

**Figure S1.** We utilized the advanced B3LYP/6-311++g(dp) method, a technique within the density functional theory (DFT) family, to meticulously optimize the molecular structures of each individual compound. This method is widely acclaimed for its exceptional balance between computational efficiency and accuracy, enabling us to delve deeply into the three-dimensional shapes of the compounds. The resulting optimized structures, depicted in Figure 1, grant us a comprehensive insight into the intricate ways in which the geometric properties of each molecule influence its behavior within diverse chemical environments.

| compound        | DBTS-CzP                                                                           | TXO-CzP                                                                            | SpDBTS-CzP                                                                          | m-CBPPO                                                                              | DPA                                                                                  |
|-----------------|------------------------------------------------------------------------------------|------------------------------------------------------------------------------------|-------------------------------------------------------------------------------------|--------------------------------------------------------------------------------------|--------------------------------------------------------------------------------------|
| LUMO (S1)<br>eV | 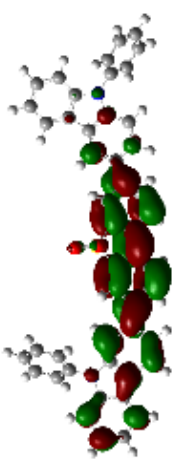  |   |   |   |   |
| HOMO (S0)<br>eV |  |  |  |  |  |

**Figure S2.** In understanding how a molecule might behave, an important factor to consider is the behavior of its frontier orbitals, namely the highest occupied molecular orbital (HOMO) and the lowest unoccupied molecular orbital (LUMO). These orbitals are key players in determining the reactivity and properties of the molecule. To gain insights into these orbitals, we employed Density Functional Theory (DFT) to calculate them, and the detailed results are presented in Table 1. Furthermore, in Figure 2, we have provided a visual representation of the orbital density distributions, which vividly illustrates the probable locations of electrons within the molecule. This visualization plays a crucial role in deepening our understanding of the electronic properties of each compound and predicting their potential chemical reactions.

The fragmentation of the single compounds for DOS analysis

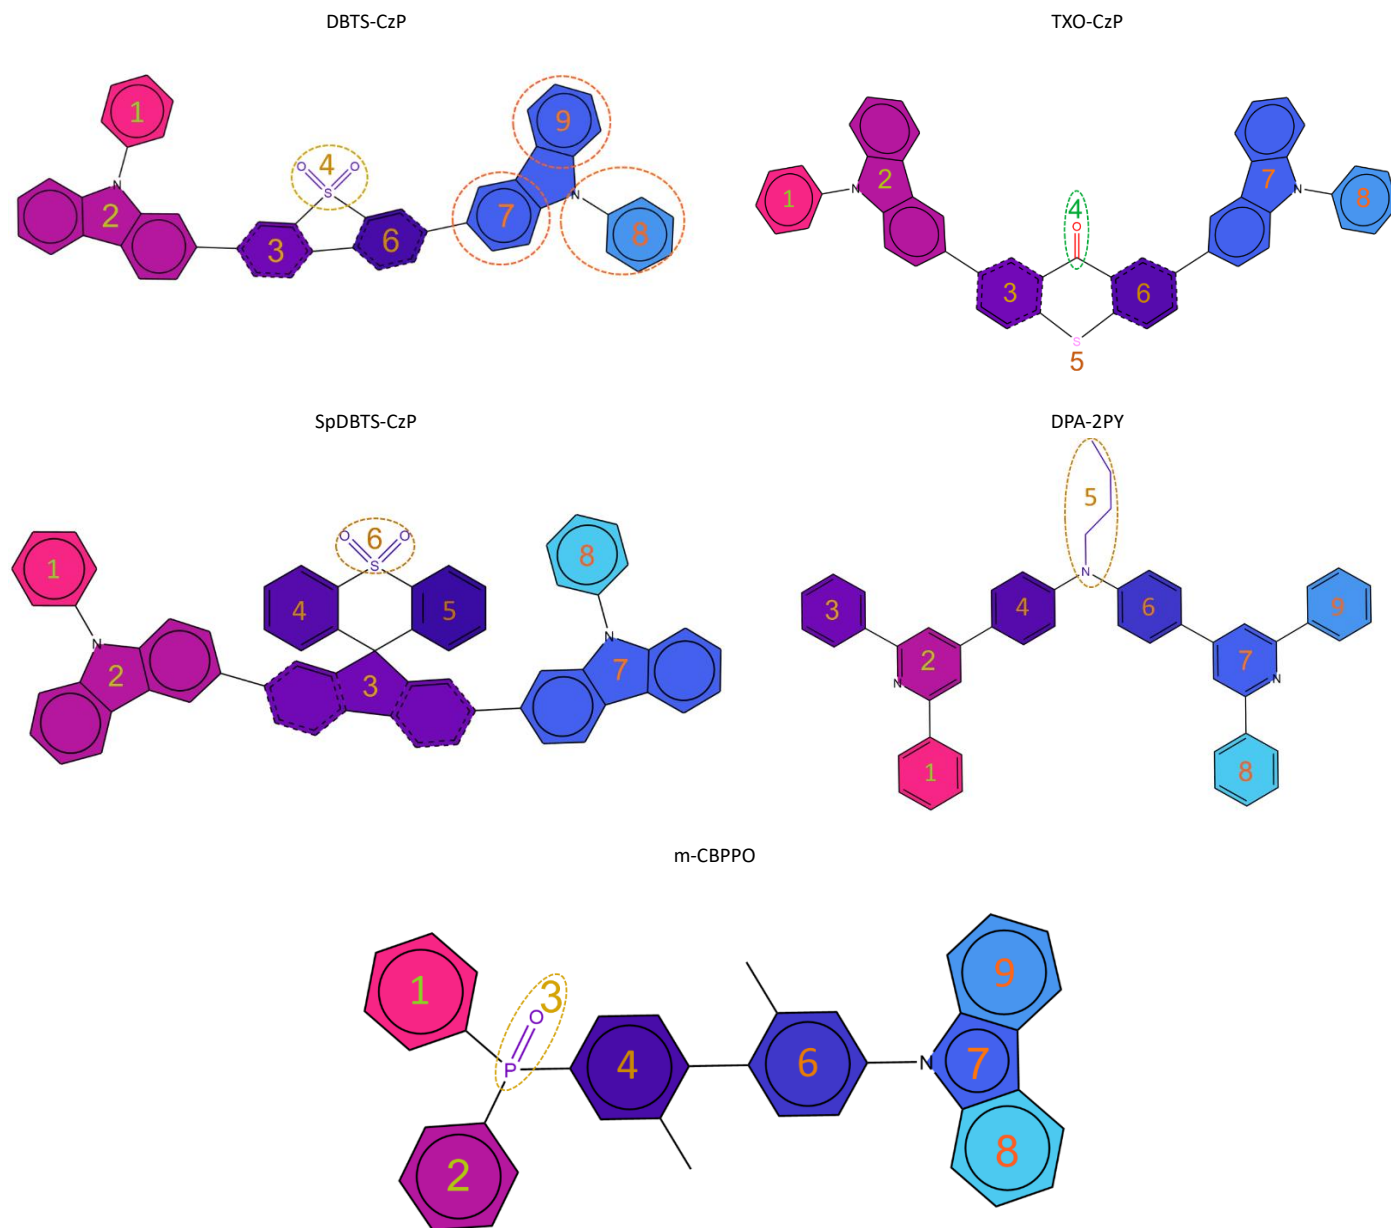

**Figure S3.** In our research, we sought to enhance our comprehension of the distribution of electronic states within these compounds through a comprehensive density of states (DOS) analysis. This involved deconstructing each compound into key fragments in order to discern the individual contributions to the overall electronic structure. In Figure 4, the DOS profiles for these fragments are depicted, providing valuable insights into the electronic behavior of each molecular component. This analysis offers a detailed examination of their respective roles in influencing the HOMO-LUMO gap, which is crucial for understanding their electronic properties.

Partial density of states of the monomer compounds. The fragmentations have been explained in the last section.

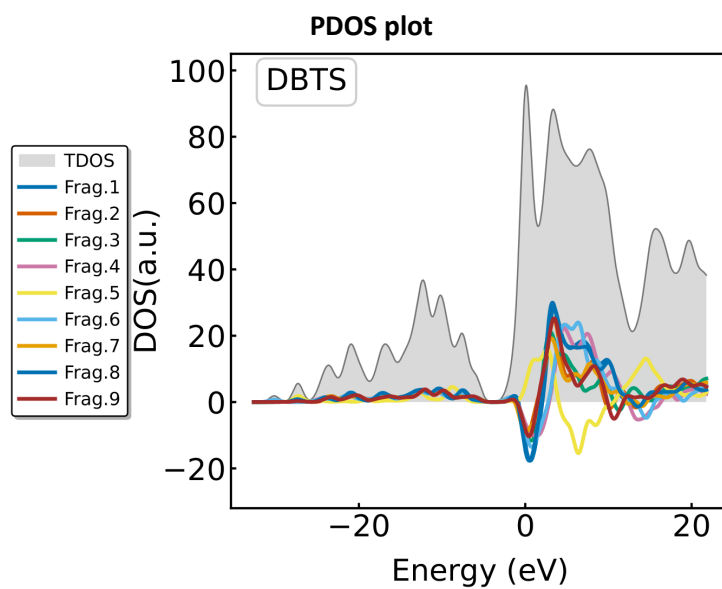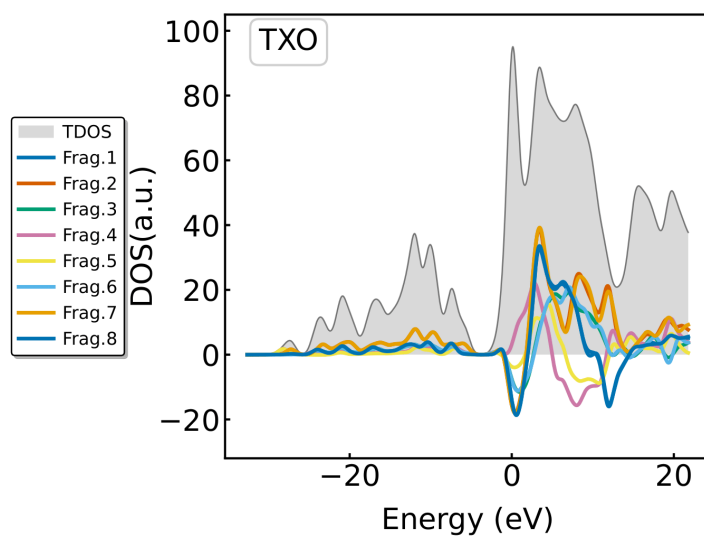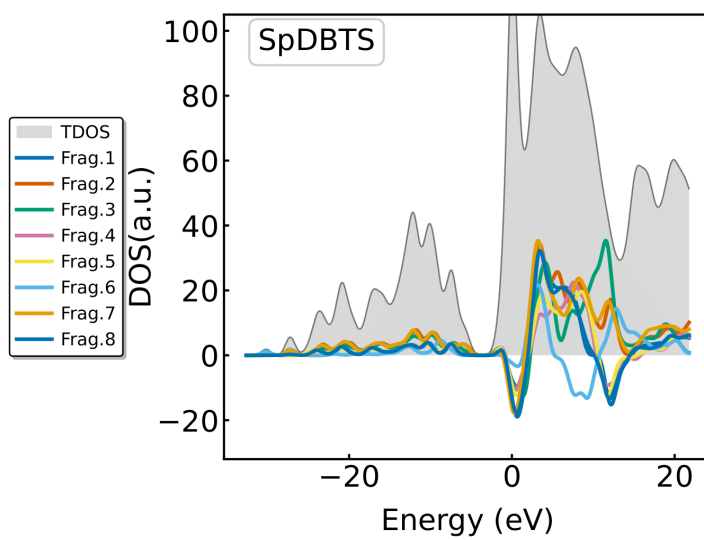

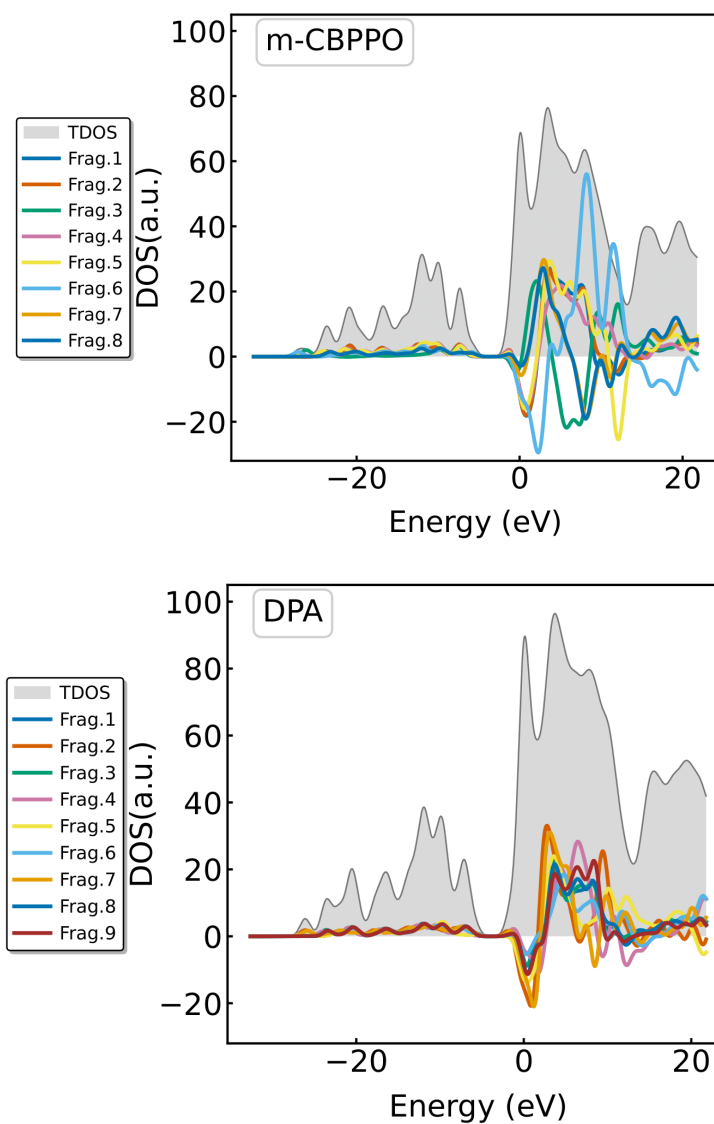

**Figure S4.** Partial density of states (PDOS) of monomer compounds.

Atom numbers of each monomer structure.

DBTS-CzP

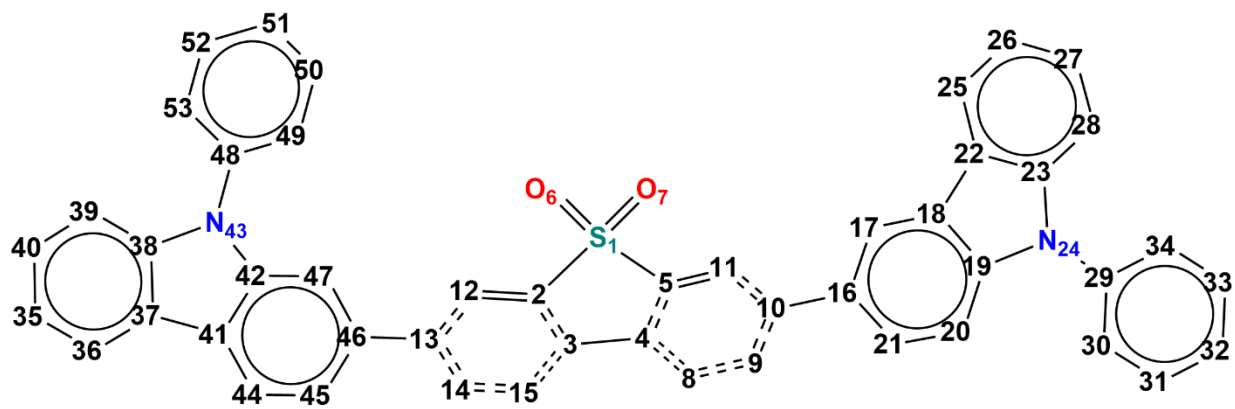

TXO-CzP

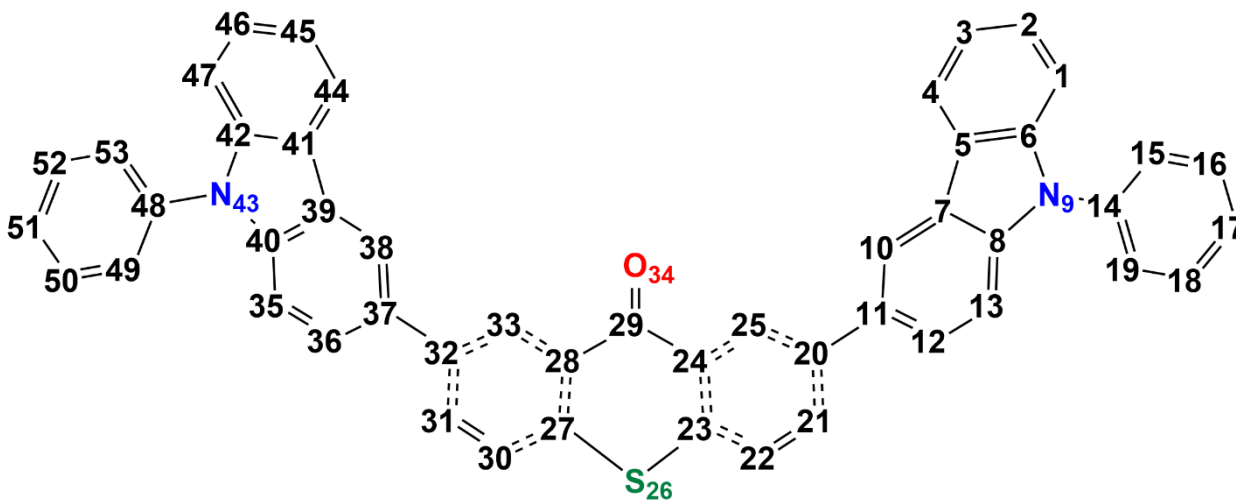

SpDBTS

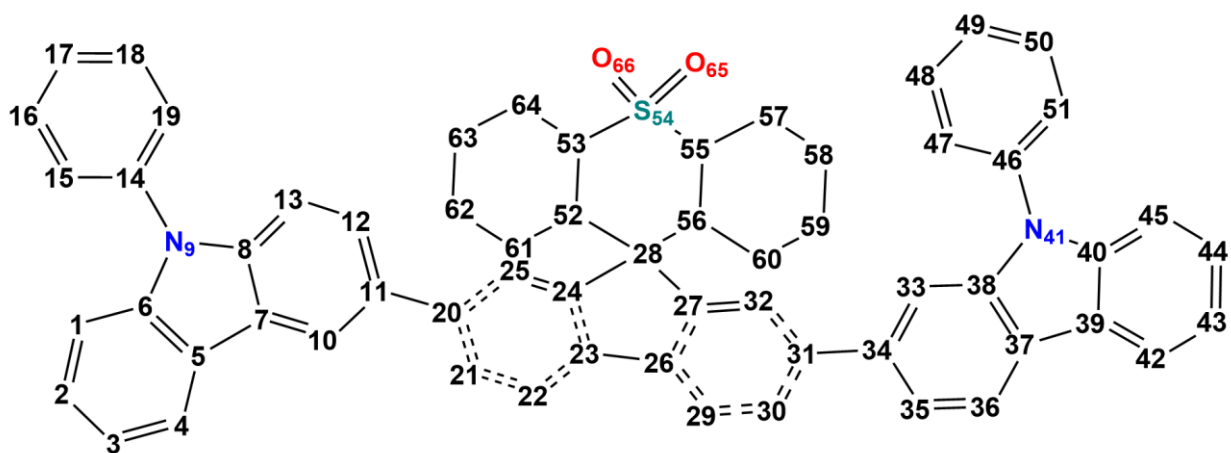

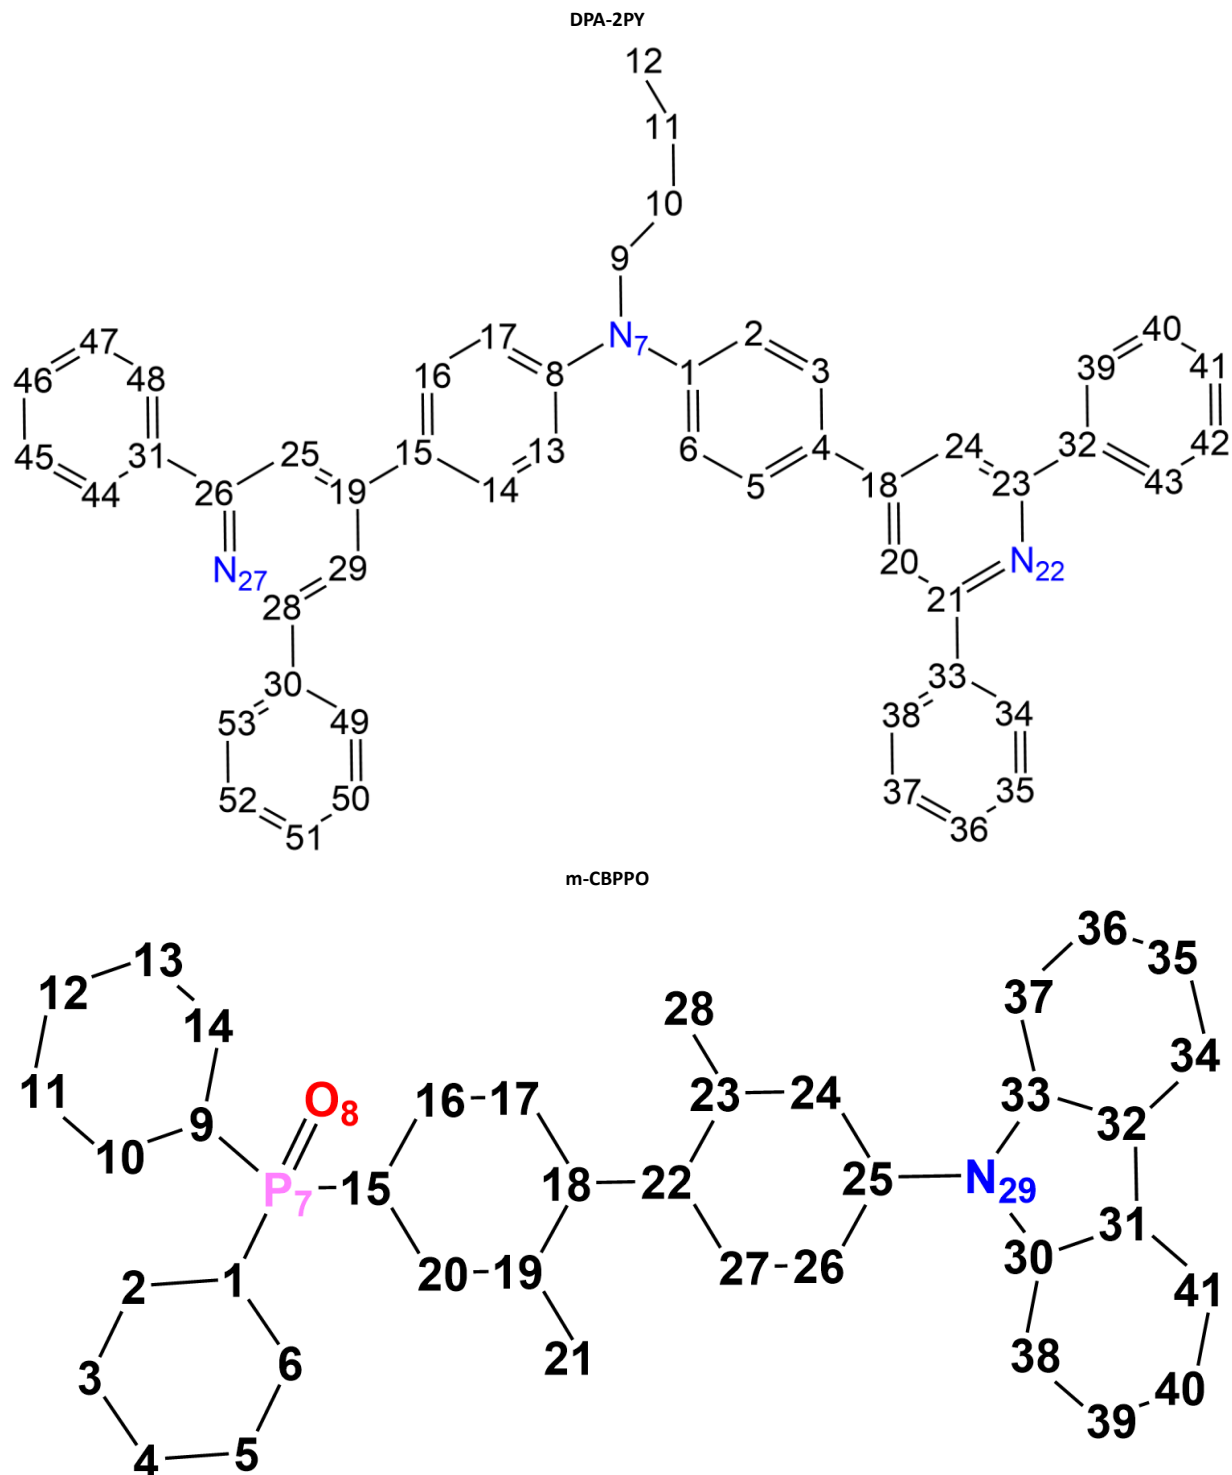

**Figure S<sup>o</sup>.** To clarify the atom numbering used in the Transition Density Matrix (TDM) analyses (Figures 4, 8, and S5), a labeled 2D sketch of the molecular structures is included in this section. Each atom in the structures is explicitly numbered, allowing for easy cross-referencing with the TDM maps and other analyses discussed in the main text.



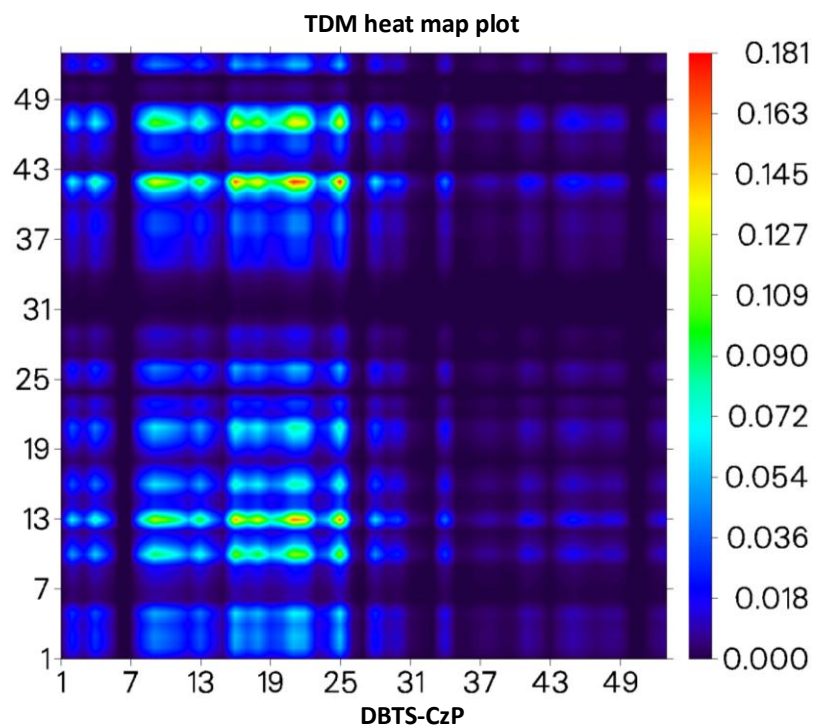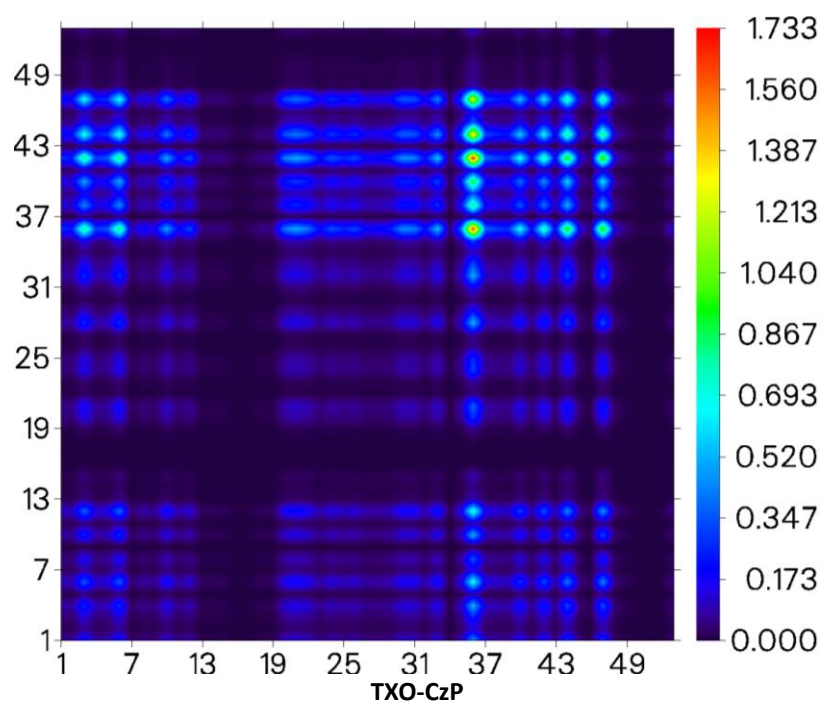

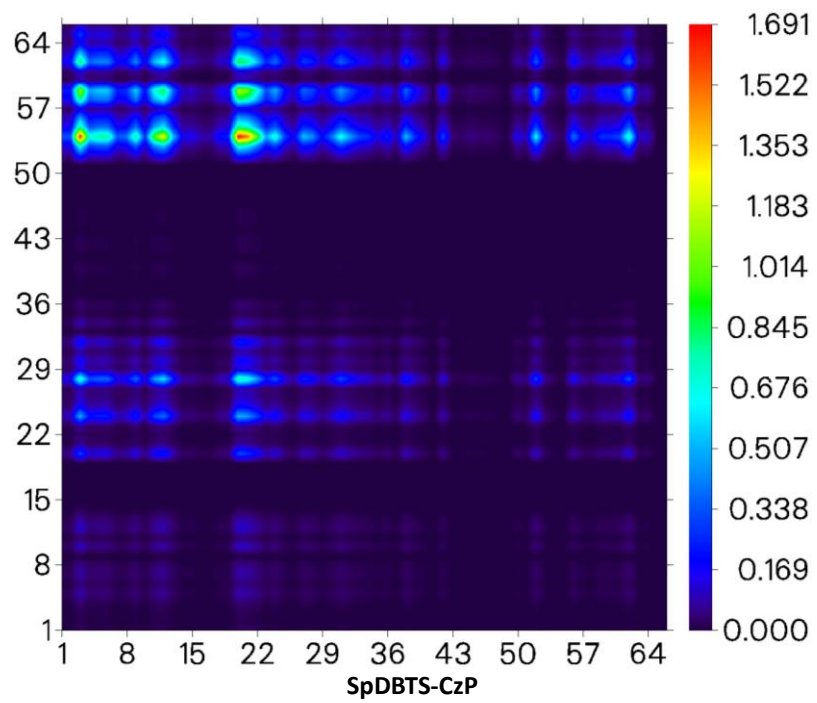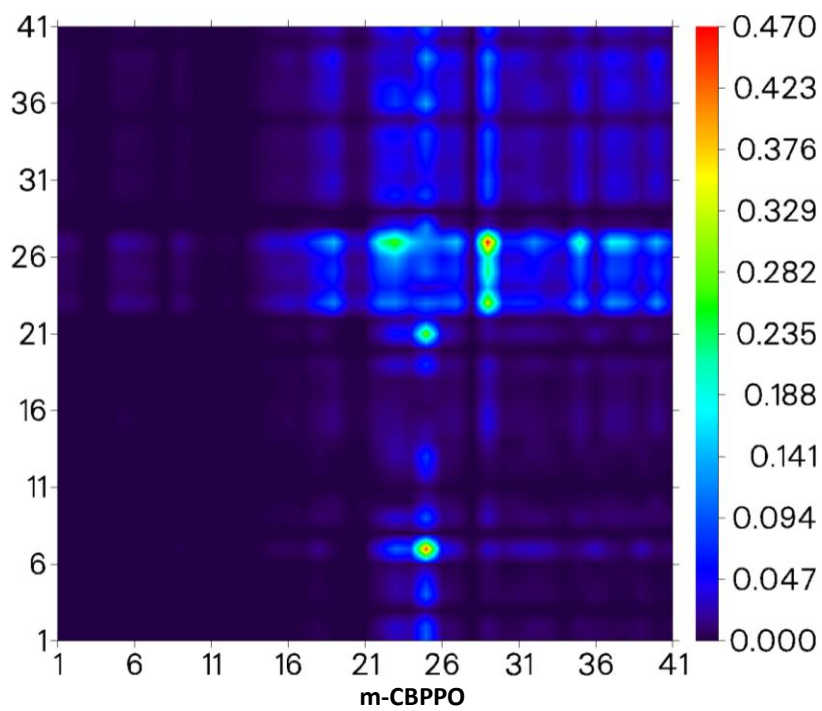

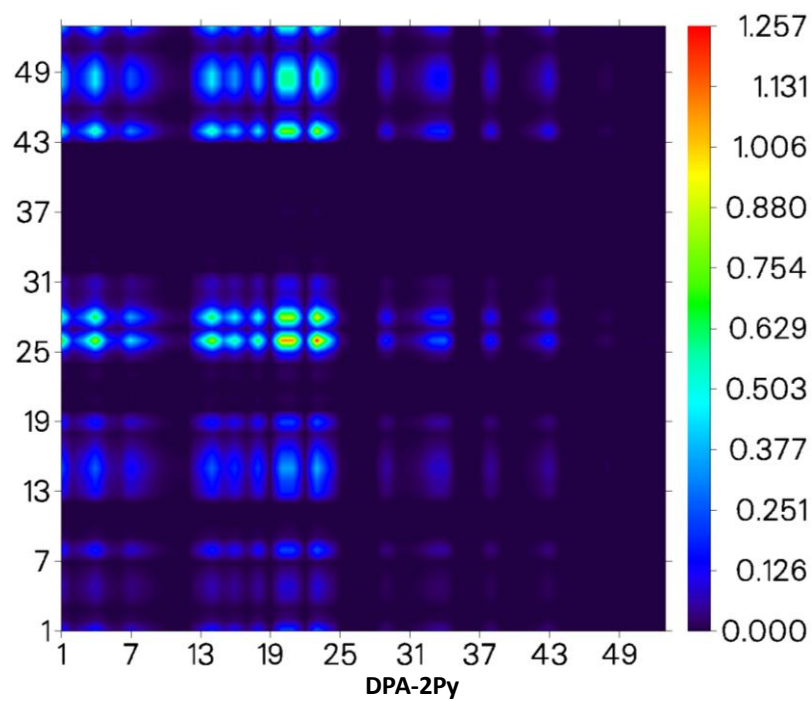

**Figure S1.** Transition density matrix (TDM) heat maps of monomer compounds.

**Table S1.** Calculated dipole moments ( $\mu$ ), total dipole moment ( $\mu_{\text{tot}}$ ) in Debye, polarizability ( $\alpha$ ) in atomic unit (a.u.), total polarizability ( $\alpha_{\text{tot}}$ ) in Å<sup>3</sup>, hyperpolarizability ( $\beta$ ) in atomic unit (a.u.), and total hyperpolarizability ( $\beta_{\text{tot}}$ ) in cm<sup>5</sup>/esu for the monomeric compounds.

| NLO parameters | DBTS-CzP    | TXO-CzP     | SpDBTS-CzP | m-CBPPO     | DPA-2PY     |
|----------------|-------------|-------------|------------|-------------|-------------|
| $\mu_x$        | 1.188       | 0.003       | -0.835     | -0.216      | -1.083      |
| $\mu_y$        | -1.44       | 0.769       | -0.368     | 1.315       | -1.272      |
| $\mu_z$        | -1.404      | 0.436       | -0.865     | 1.006       | -0.331      |
| $\alpha_{xx}$  | 1115.62     | 980.845     | 1180.5     | 604.73      | 886.293     |
| $\alpha_{yy}$  | 626.883     | 682.379     | 772.452    | 431.571     | 738.89      |
| $\alpha_{zz}$  | 348.131     | 381.28      | 522.21     | 396.78      | 374.583     |
| $\alpha_{xy}$  | 29.199      | 5.711       | 18.995     | -9.805      | 4.289       |
| $\alpha_{xz}$  | 9.458       | 8.167       | -4.285     | -1.222      | -9.575      |
| $\alpha_{yz}$  | 17.947      | 37.549      | -14.165    | 44.577      | -12.169     |
| $\beta_{xxx}$  | 4602.36     | 10.084      | 9588.51    | 987.226     | -3103.99    |
| $\beta_{yyy}$  | -330.053    | -396.264    | -294.291   | -81.684     | 643.953     |
| $\beta_{zzz}$  | 97.351      | 45.023      | -110.214   | -121.864    | 99.68       |
| $\beta_{xyy}$  | -41.437     | 22.745      | -794.393   | -286.482    | -719.125    |
| $\beta_{xxy}$  | 3592.74     | -1591.28    | 1027.84    | 41.688      | -3120.35    |
| $\beta_{xxz}$  | 480.549     | -651.161    | 146.054    | 9.332       | -195.702    |
| $\beta_{xzz}$  | 13.813      | -4.576      | 47.145     | -195.729    | -75.04      |
| $\beta_{yzz}$  | 17.883      | 93.05       | 22.496     | -66.486     | 68.359      |
| $\beta_{yyz}$  | 67.057      | 376.58      | 131.398    | -66.372     | -157.633    |
| $\mu$          | 2.336297    | 0.884       | 1.258      | 1.67        | 1.703       |
| $\alpha$       | 103.266     | 100.988     | 122.26     | 70.786      | 98.778      |
| $\beta$        | 4.89524E-29 | 1.64886E-29 | 7.6675E-29 | 4.71919E-30 | 3.96454E-29 |

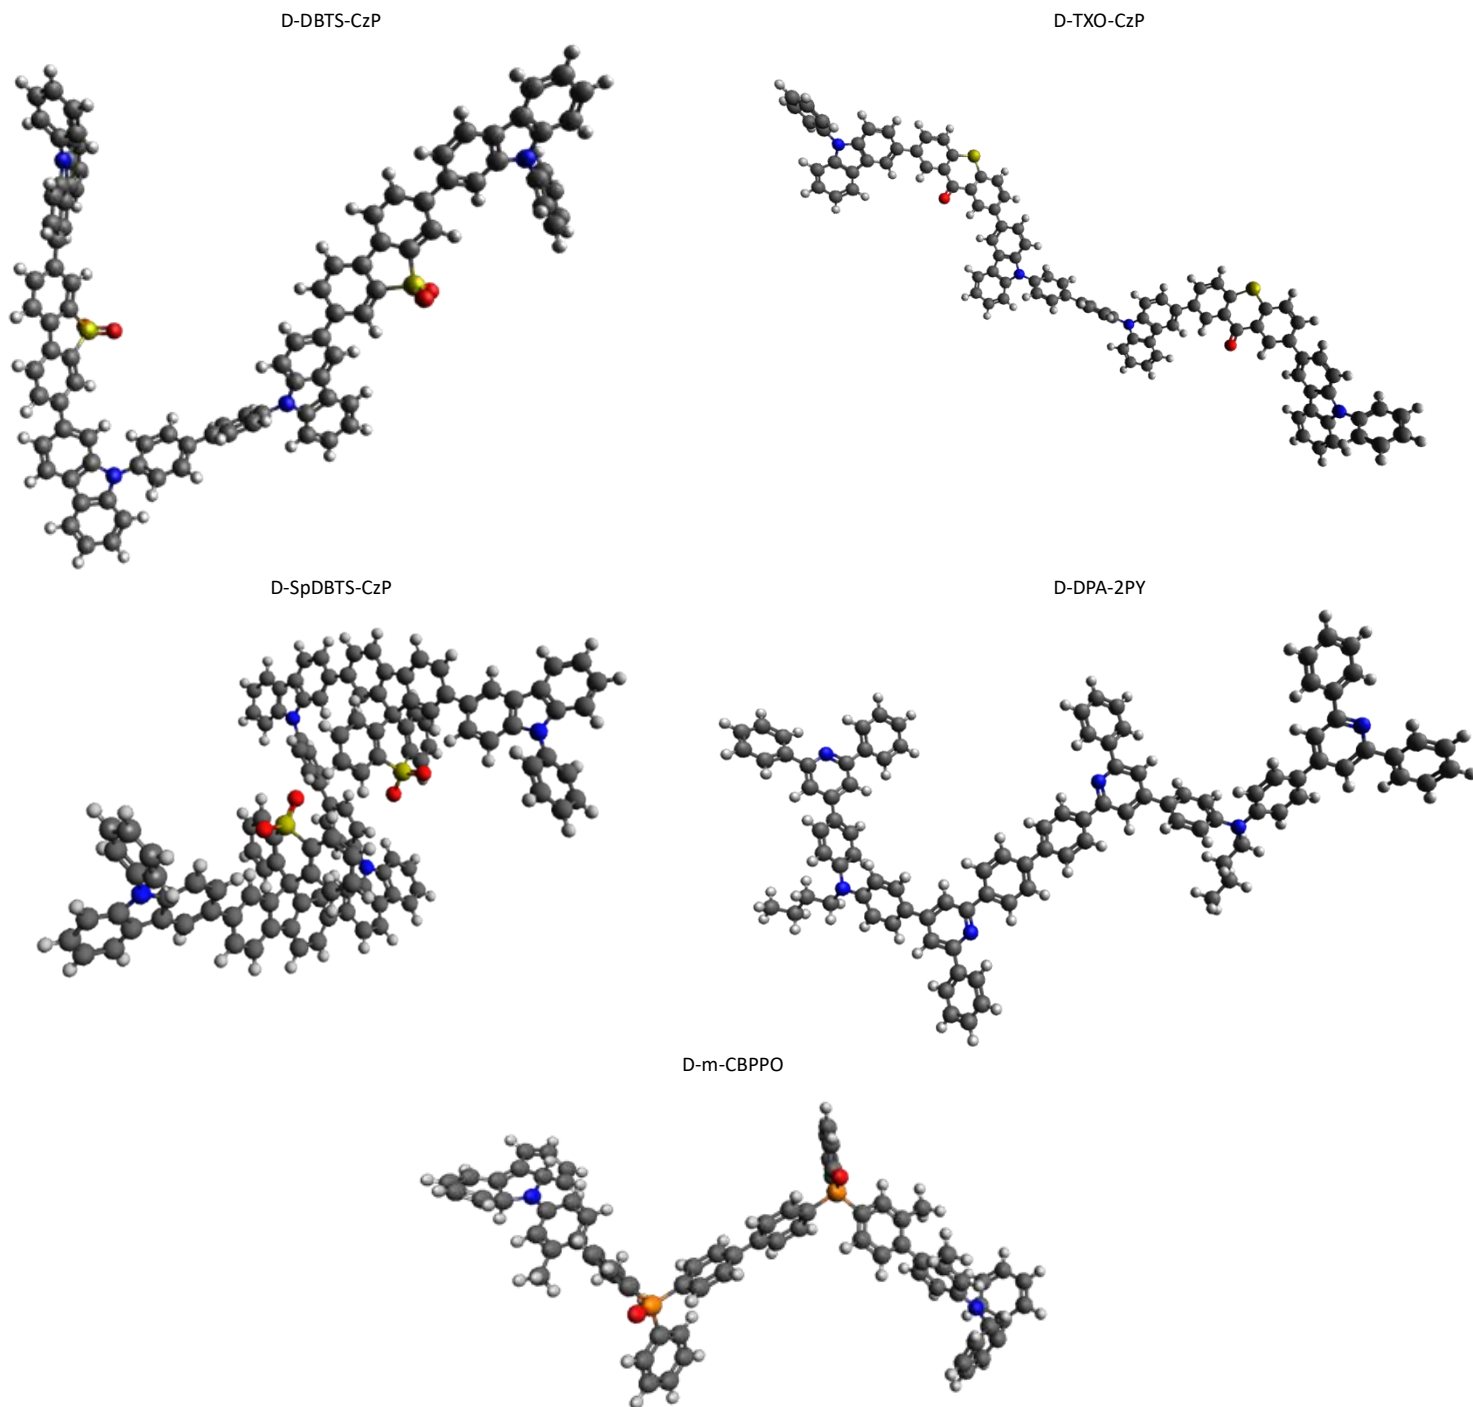

**Figure S9.** In our research, we delved beyond single compounds and proceeded to analyze the dimer forms, which are essentially pairs of molecules interacting with each other. To do this, we used the DFT method to optimize the structures of these dimers, and their optimized configurations are illustrated in Figure 5. Our focus on dimers is crucial as it provides us with a deeper understanding of how these molecules interact with each other. This detailed exploration sheds light on complex phenomena such as  $\pi$ - $\pi$  stacking and hydrogen bonding, which ultimately impact the overall properties of the compounds.

| compound     | D-DBTS-CzP                                                                         | D-TXO-CzP                                                                          | D-SpDBTS-CzP                                                                        | D-m-CBPPO                                                                            | D-DPA                                                                                |
|--------------|------------------------------------------------------------------------------------|------------------------------------------------------------------------------------|-------------------------------------------------------------------------------------|--------------------------------------------------------------------------------------|--------------------------------------------------------------------------------------|
| LUMO (S1) eV | 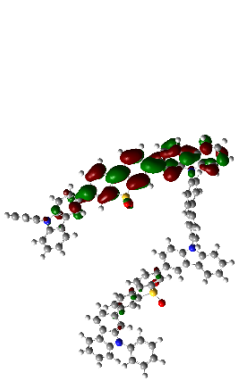  |   |   |   |   |
| HOMO (S0) eV |  |  |  |  |  |

**Figure S<sup>Λ</sup>.** In our analysis, we carried out calculations of the frontier orbitals for the dimers in order to assess and compare their electronic properties with those of the single compounds. Our findings are summarized in Table 2, which presents the HOMO and LUMO levels for each dimer. Additionally, the accompanying orbital density plots in Figure 6 visually illustrate how the electron clouds are distributed within the molecular structures. This detailed information is particularly crucial for gaining insights into the absorption properties of the dimers and understanding the potential movement of charge between the two molecular units.



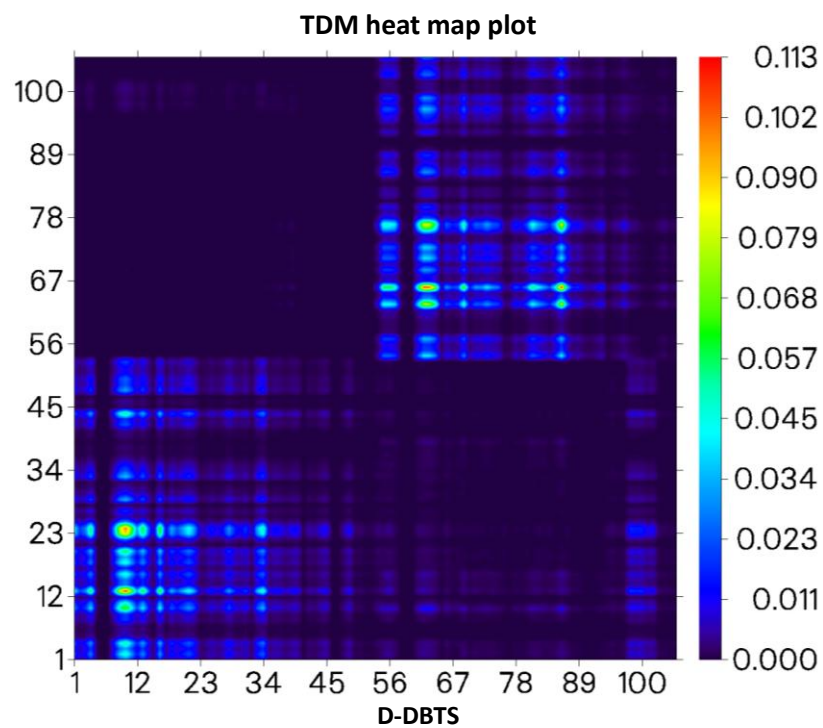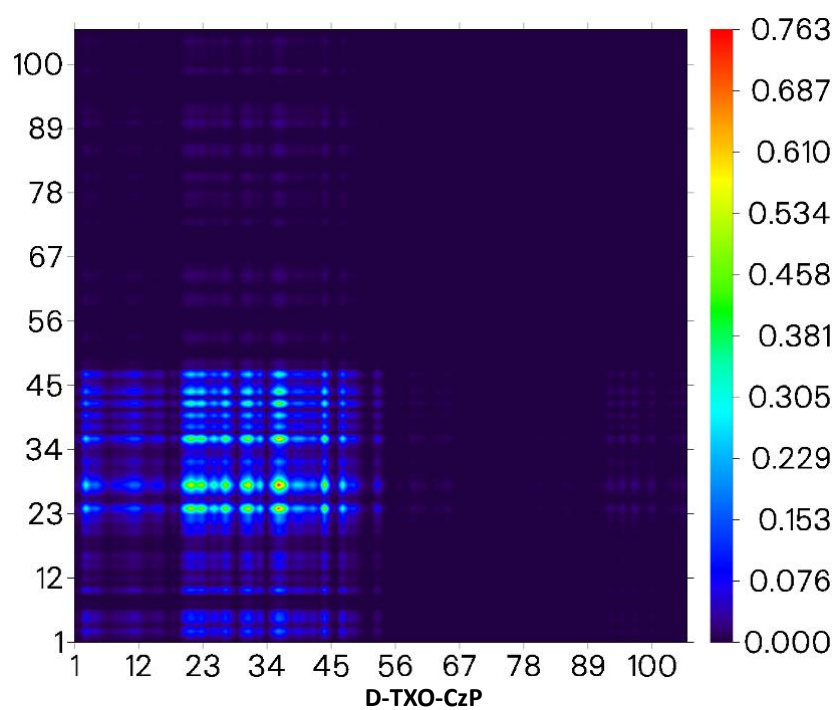

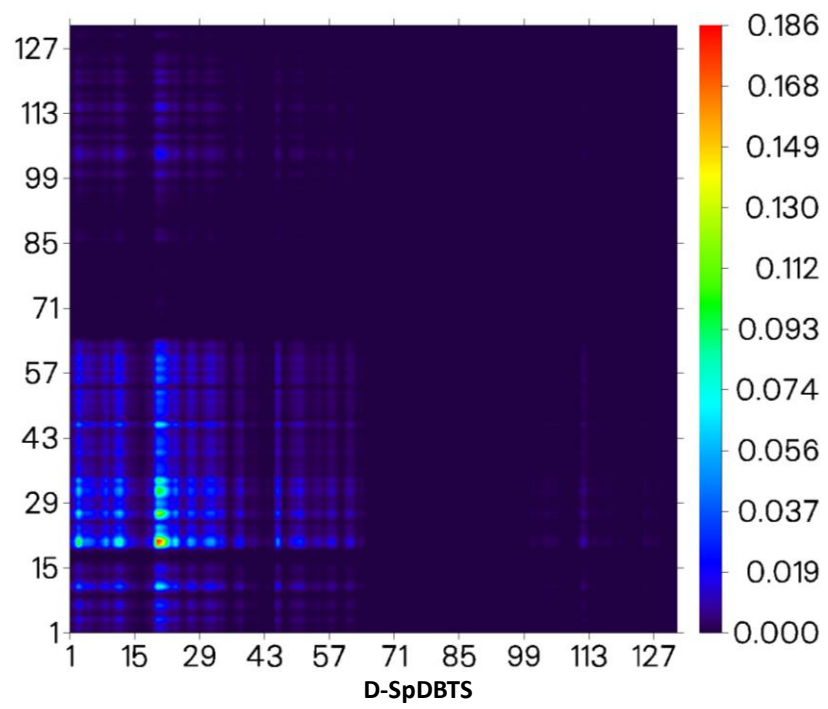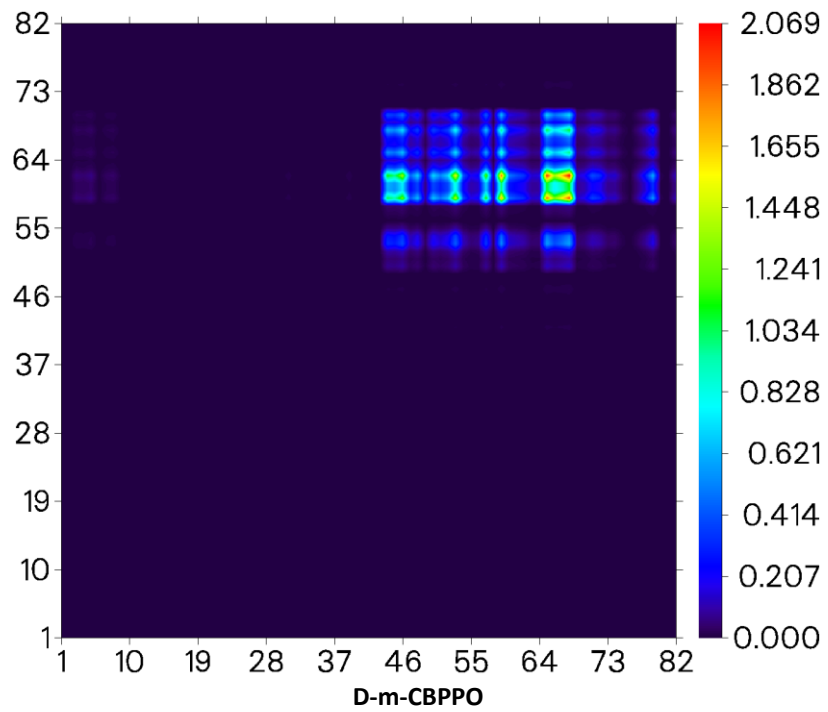



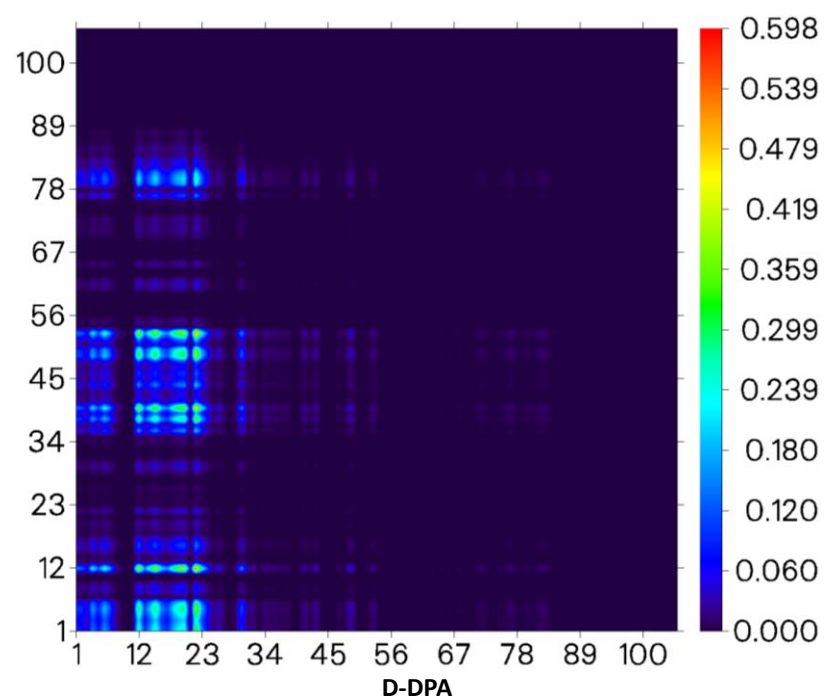

**Figure S<sup>9</sup>.** Transition density matrix heat maps for all dimer compounds.

**Table S2.** Calculated dipole moments ( $\mu$ ), total dipole moment ( $\mu_{\text{tot}}$ ) in Debye, polarizability ( $\alpha$ ) in atomic unit (a.u.), total polarizability ( $\alpha_{\text{tot}}$ ) in Å<sup>3</sup>, hyperpolarizability ( $\beta$ ) in atomic unit (a.u.), and total hyperpolarizability ( $\beta_{\text{tot}}$ ) in cm<sup>5</sup>/esu for the dimer compounds.

| NLO parameters | D-DBTS-CzP  | D-TXO-CzP  | D-SpDBTS-CzP | D-m-CBPPO   | D-DPA-2PY   |
|----------------|-------------|------------|--------------|-------------|-------------|
| $\mu_x$        | 2.107       | -0.043     | -0.046       | -0.762      | -2.712      |
| $\mu_y$        | 2.696       | -1.471     | -0.478       | 0.015       | 1.025       |
| $\mu_z$        | -0.956      | 0.768      | 0.05         | 4.491       | 1.107       |
| $\alpha_{xx}$  | 1691.85     | 1985.93    | 1678.04      | 1201.53     | 1833.03     |
| $\alpha_{yy}$  | 1720.99     | 1188.85    | 1705.85      | 1027.31     | 1556.19     |
| $\alpha_{zz}$  | 866.264     | 1085.6     | 1627.9       | 809.595     | 793.577     |
| $\alpha_{xy}$  | -386.235    | 36.662     | 40.603       | 21.301      | -18.946     |
| $\alpha_{xz}$  | -57.984     | -16.856    | 69.346       | 62.686      | 78.399      |
| $\alpha_{yz}$  | -76.05      | -219.062   | 79.907       | -71.999     | 42.203      |
| $\beta_{xxx}$  | -772.244    | 390.485    | -2523.22     | -35.37      | -7943.94    |
| $\beta_{yyy}$  | 590.128     | 701.863    | 7463.01      | 567.138     | 855.278     |
| $\beta_{zzz}$  | -187.519    | -1101.81   | -1831.79     | -340.007    | -47.498     |
| $\beta_{xyy}$  | 261.767     | -259.082   | 2118.45      | 81.374      | -1879.77    |
| $\beta_{xxy}$  | -1879.84    | 1412.13    | 1530.17      | -129.544    | 459.709     |
| $\beta_{xxz}$  | 1152.24     | -1838.42   | -2654.5      | 708.725     | 1678.91     |
| $\beta_{xzz}$  | -11.835     | 131.838    | -1871.69     | -78.318     | -467.602    |
| $\beta_{yzz}$  | 259.153     | 157.451    | 1149.53      | 41.032      | 36.621      |
| $\beta_{yyz}$  | 2576.9      | 47.386     | 2360.88      | -15.679     | -56.116     |
| $\mu$          | 3.553       | 1.66       | 0.483445     | 4.556       | 3.104       |
| $\alpha$       | 211.365     | 210.441    | 247.556      | 150.083     | 206.608     |
| $\beta$        | 3.21841E-29 | 3.1857E-29 | 9.1664E-29   | 5.14574E-30 | 9.07001E-29 |
